# Supplementary material
Source: publisher site journal article supplement (https://www.spandidos-publications.com/6423/downloadSupplementary)
Supplement: Supplementary file 1 [file downloadSupplementary]

Table SI. The list of primer sequences for reverse transcription-quantitative PCR analysis.

| Gene name          | Primer sequence                                                |
|--------------------|----------------------------------------------------------------|
| p21                | F:5'-CCCAAGCTCTACCTTCCCAC-3'<br>R:5'-CTGAGAGTCTCCAGGTCCAC-3'   |
| p27                | F: 5'-AGGAACTCGACTCAGACGTG-3'<br>R: 5'-TATTTGGAGGCACAGCAGGA-3' |
| p53                | F:5'-TGGCCATCTACAAGCAGTCA-3'<br>R:5'-GGTACAGTCAGAGCCAACCT-3'   |
| $\alpha$ -SM-actin | F:5'-ACCCAGCACCATGAAGATCA-3'<br>R:5'-TTTGCGGTGGACAATGGAAG-3'   |
| TAGLN              | F:5'-GGCTGAAGAATGGCGTGATT-3'<br>R:5'-CTGCCATGTCTTTGCCCTTCA-3'  |
| Calponin 1         | F: 5'-GTGAAGCCCCACGACATTTT-3'<br>R:5'-TGATGTTCCGCCCTTCTCTT-3'  |
| $\beta$ -actin     | F:5'-CATCCGCAAAGACCTGTACG-3'<br>R:5'-CCTGCTTGCTGATCCACATC-3'   |

F, forward; R, reverse.
